# Supplementary material for: Patients’ preferences for bone metastases treatments in France, Germany and the United Kingdom
Source: PubMed Central journal article supplement — Support Care Cancer. 2014 Jun 18;23(1):21–8. doi: 10.1007/s00520-014-2309-x (PMC4268443; doi:10.1007/s00520-014-2309-x), 2014-06-18
Supplement: 520_2014_2309_MOESM1_ESM.pdf [file 520_2014_2309_MOESM1_ESM.pdf]

# Supplemental Figure 1. Example Choice Question

| Medication Feature                                                                    | Medication A                                                                                            | Medication B                                                                                               |
|---------------------------------------------------------------------------------------|---------------------------------------------------------------------------------------------------------|------------------------------------------------------------------------------------------------------------|
| Months until you have a complication of bone metastases                               | 28 months                                                                                               | 18 months                                                                                                  |
| Months until your pain gets worse                                                     | 3 months                                                                                                | 6 months                                                                                                   |
| Chance of a problem with your teeth and/or jaw bone each year because of the medicine | 5 out of 100 (5%)<br>  | None                                                                                                       |
| Chance of kidney damage because of the medicine each year                             | 4 out of 100 (4%)<br> | 10 out of 100 (10%)<br> |
| How you take the medicine                                                             | 120-minute infusion every 4 weeks                                                                       | Injection every 4 weeks                                                                                    |
| Which would you choose?                                                               | <input type="radio"/>                                                                                   | <input type="radio"/>                                                                                      |
